# Supplementary material for: Genome-wide analysis of PDX1 target genes in human pancreatic progenitors
Source: PubMed Central journal article supplement — Mol Metab. 2018 Jan 31;9:57–68. doi: 10.1016/j.molmet.2018.01.011 (PMC5870105; doi:10.1016/j.molmet.2018.01.011), 2018-01-31

# Supplement Figure 1: Reprogramming of skin fibroblasts into XM001 iPSCs.

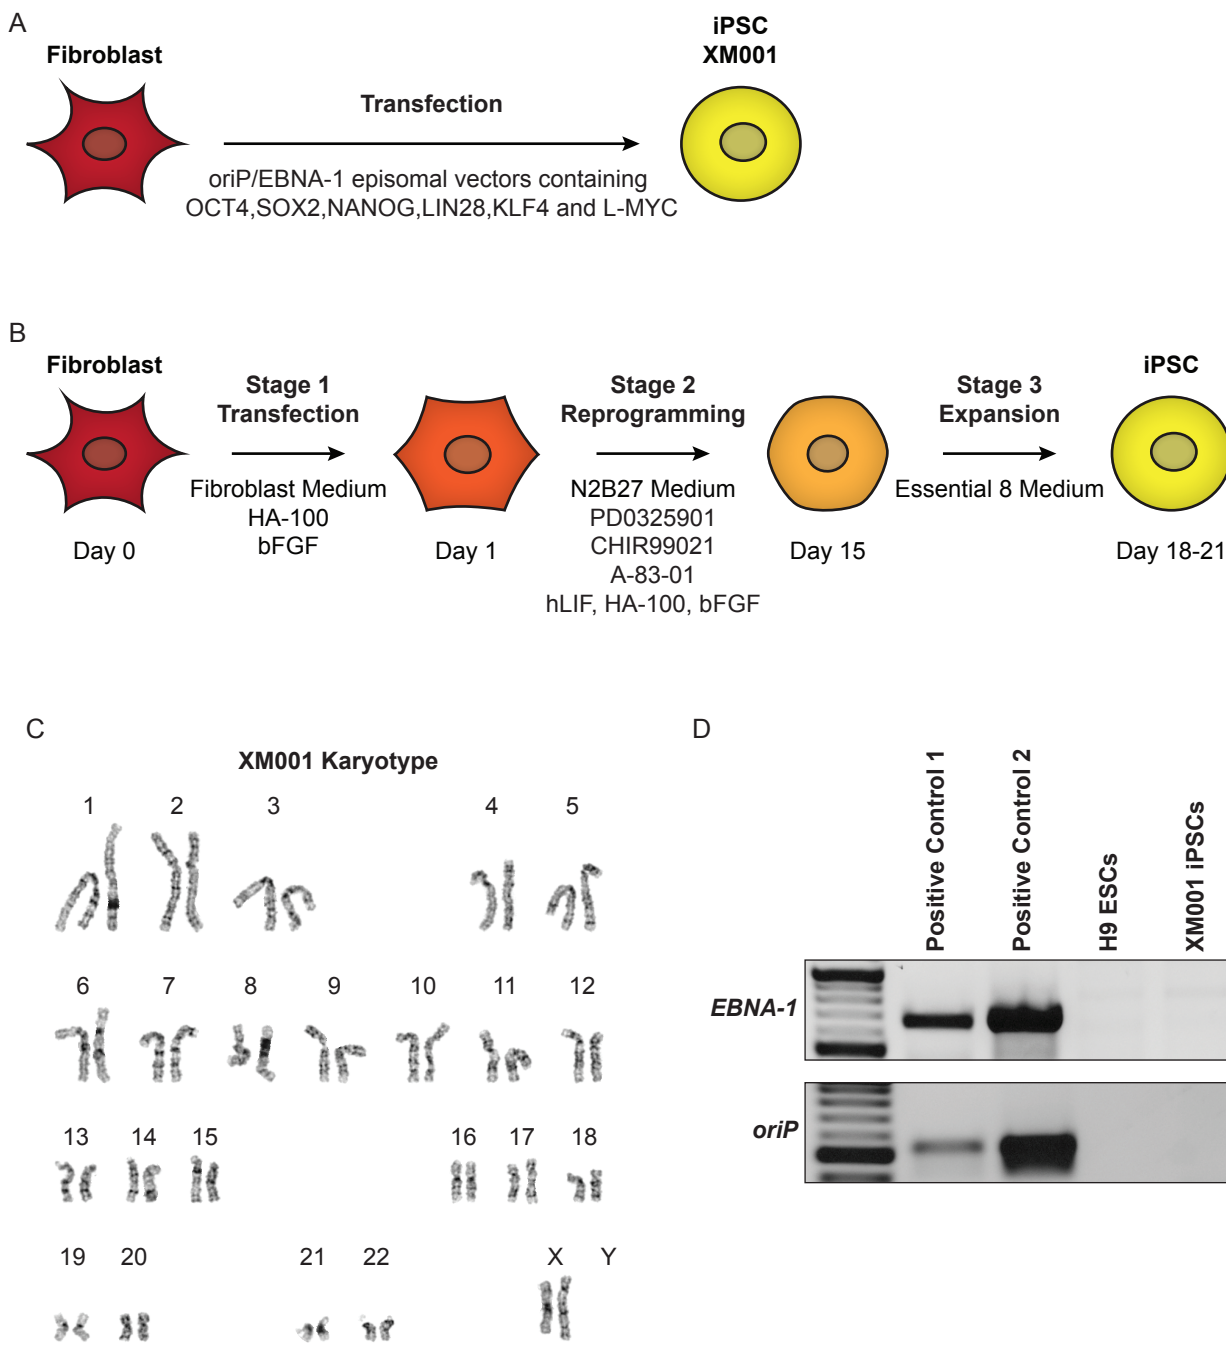

Supplement Figure 2: XM001 iPSCs are pluripotent *in vitro*.

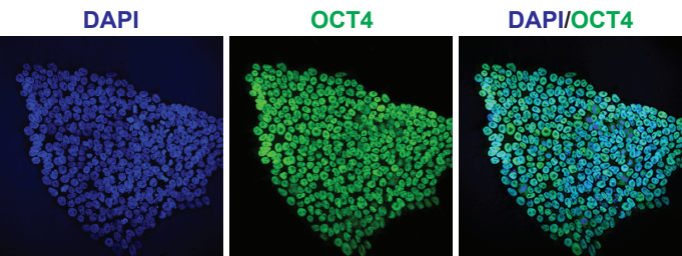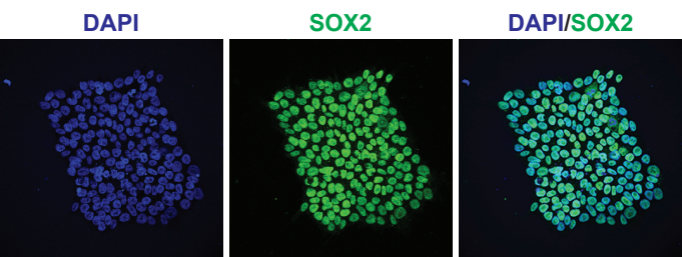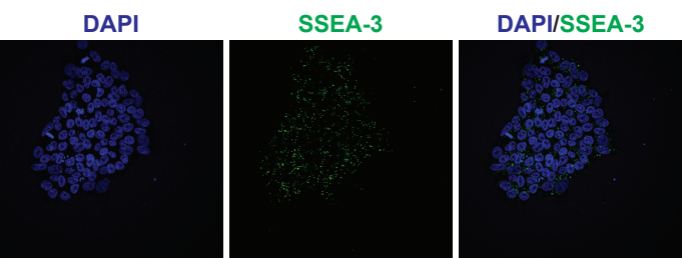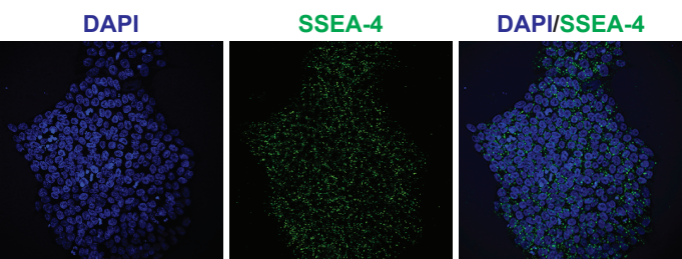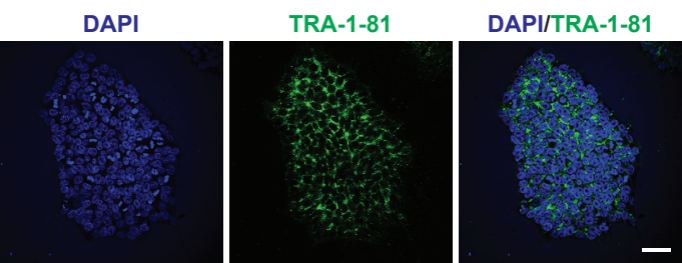

# Supplement Figure 3. XM001 iPSCs are pluripotent *in vivo*.

## Neural rosettes

## Pigmented epithelium

Ectoderm

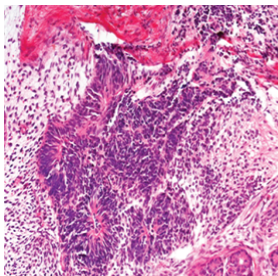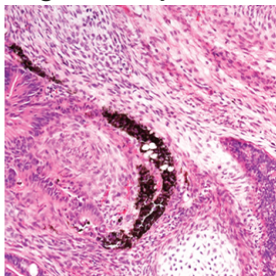

## Cartilage

## Smooth muscle

Mesoderm

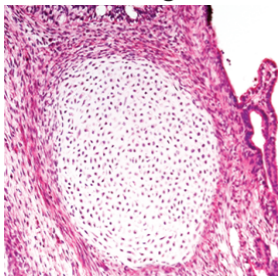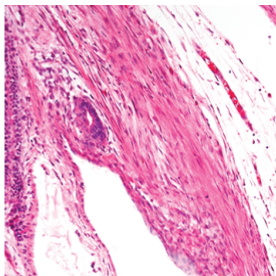

## Gut epithelium

## Respiratory epithelium

Endoderm

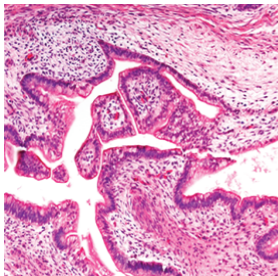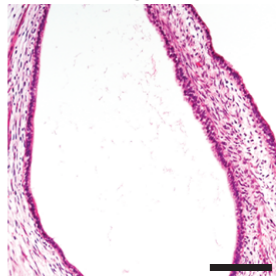

# Supplement Figure 4: Hierarchical clustering of H3K27ac at different stages.

## *In vitro* Derived Progenitors

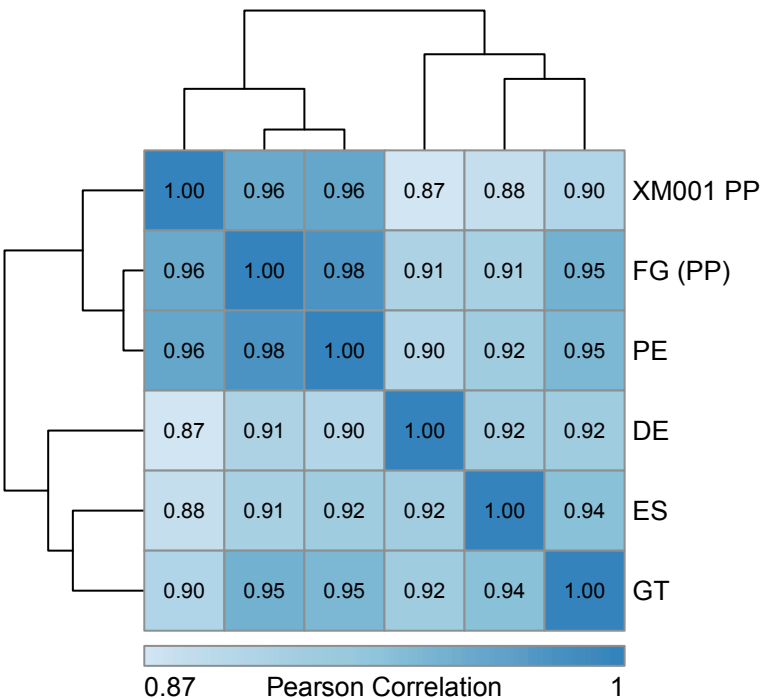

# Supplement Figure 5: H3K27ac is enriched at PDX1 binding sites.

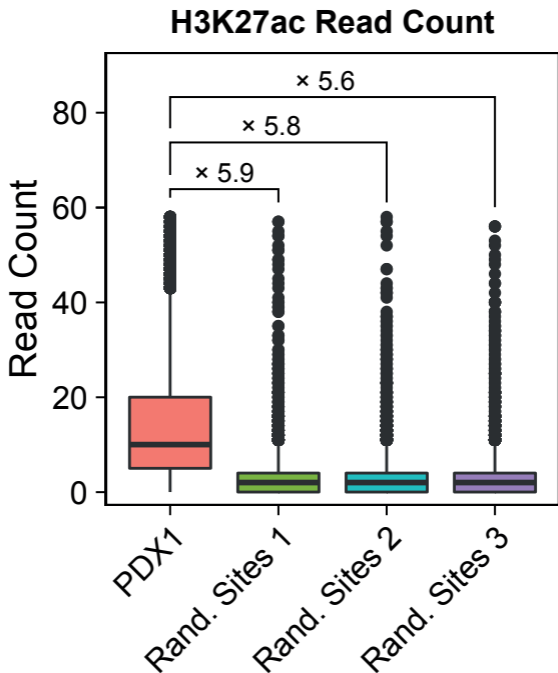

# Supplement Figure 6: Comparison of PDX1 binding in XM001 PPs with previous datasets.

**PDX1 Sites  
XM001 PP  
(this study)**

**PDX1 Sites  
hESC derived PP  
(Teo et al. 2015)**

**PDX1 Sites  
hESC derived PE  
(Wang et al. 2015)**

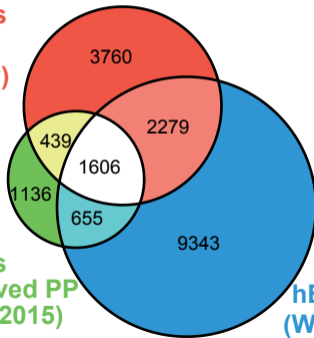

Supplement Figure 7: Differential binding of PDX1 in XM001 PPs and adult islets.

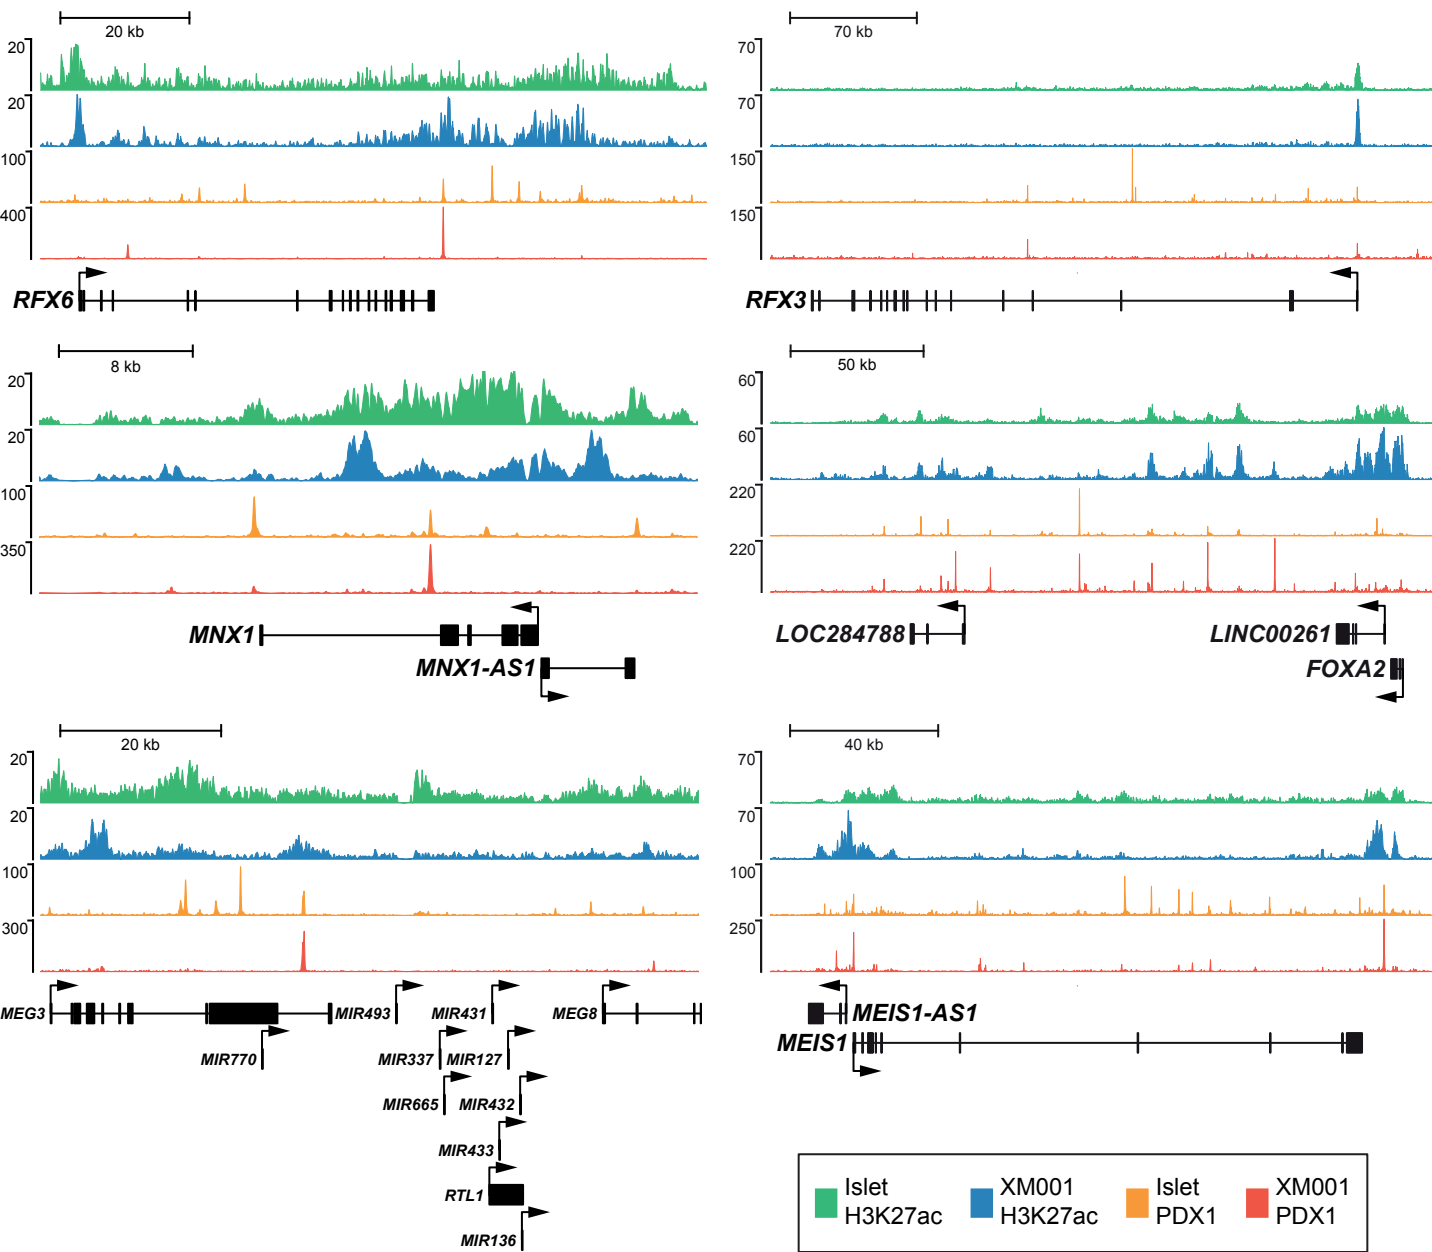

Supplement: mmc1.pdf [file mmc1.pdf]
